# Supplementary material for: APOBEC3A deaminates transiently exposed single-strand DNA during LINE-1 retrotransposition
Source: eLife journal article supplement (doi:10.7554/elife.02008), 2014-04-24
Supplement: supp [file elife-02008-supp-v1.zip]

Archive with 10 entries (10 files):
- elife_poa_e02008_Figure_1_figure_supplement_1.pdf
- elife_poa_e02008_Figure_3_figure_supplement_3.pdf
- elife_poa_e02008_Figure_2_figure_supplement_2.pdf
- elife_poa_e02008_Figure_3_figure_supplement_1.pdf
- elife_poa_e02008_Figure_2_figure_supplement_3.pdf
- elife_poa_e02008_Figure_3_figure_supplement_2.pdf
- elife_poa_e02008_Figure_2_figure_supplement_1.pdf
- elife_poa_e02008_Figure_2_figure_supplement_4.pdf
- elife_poa_e02008_Figure_3_figure_supplement_5.pdf
- elife_poa_e02008_Figure_3_figure_supplement_4.pdf
