# Supplementary material for: APOBEC3A deaminates transiently exposed single-strand DNA during LINE-1 retrotransposition
Source: eLife journal article supplement (doi:10.7554/elife.02008), 2014-04-24
Supplement: supp [file elife-02008-supp-v1.zip]

Figure 3-Figure Supplement 3

A3A-C106S insertions; JM140/L1.3/ $\Delta^2$ /k7:

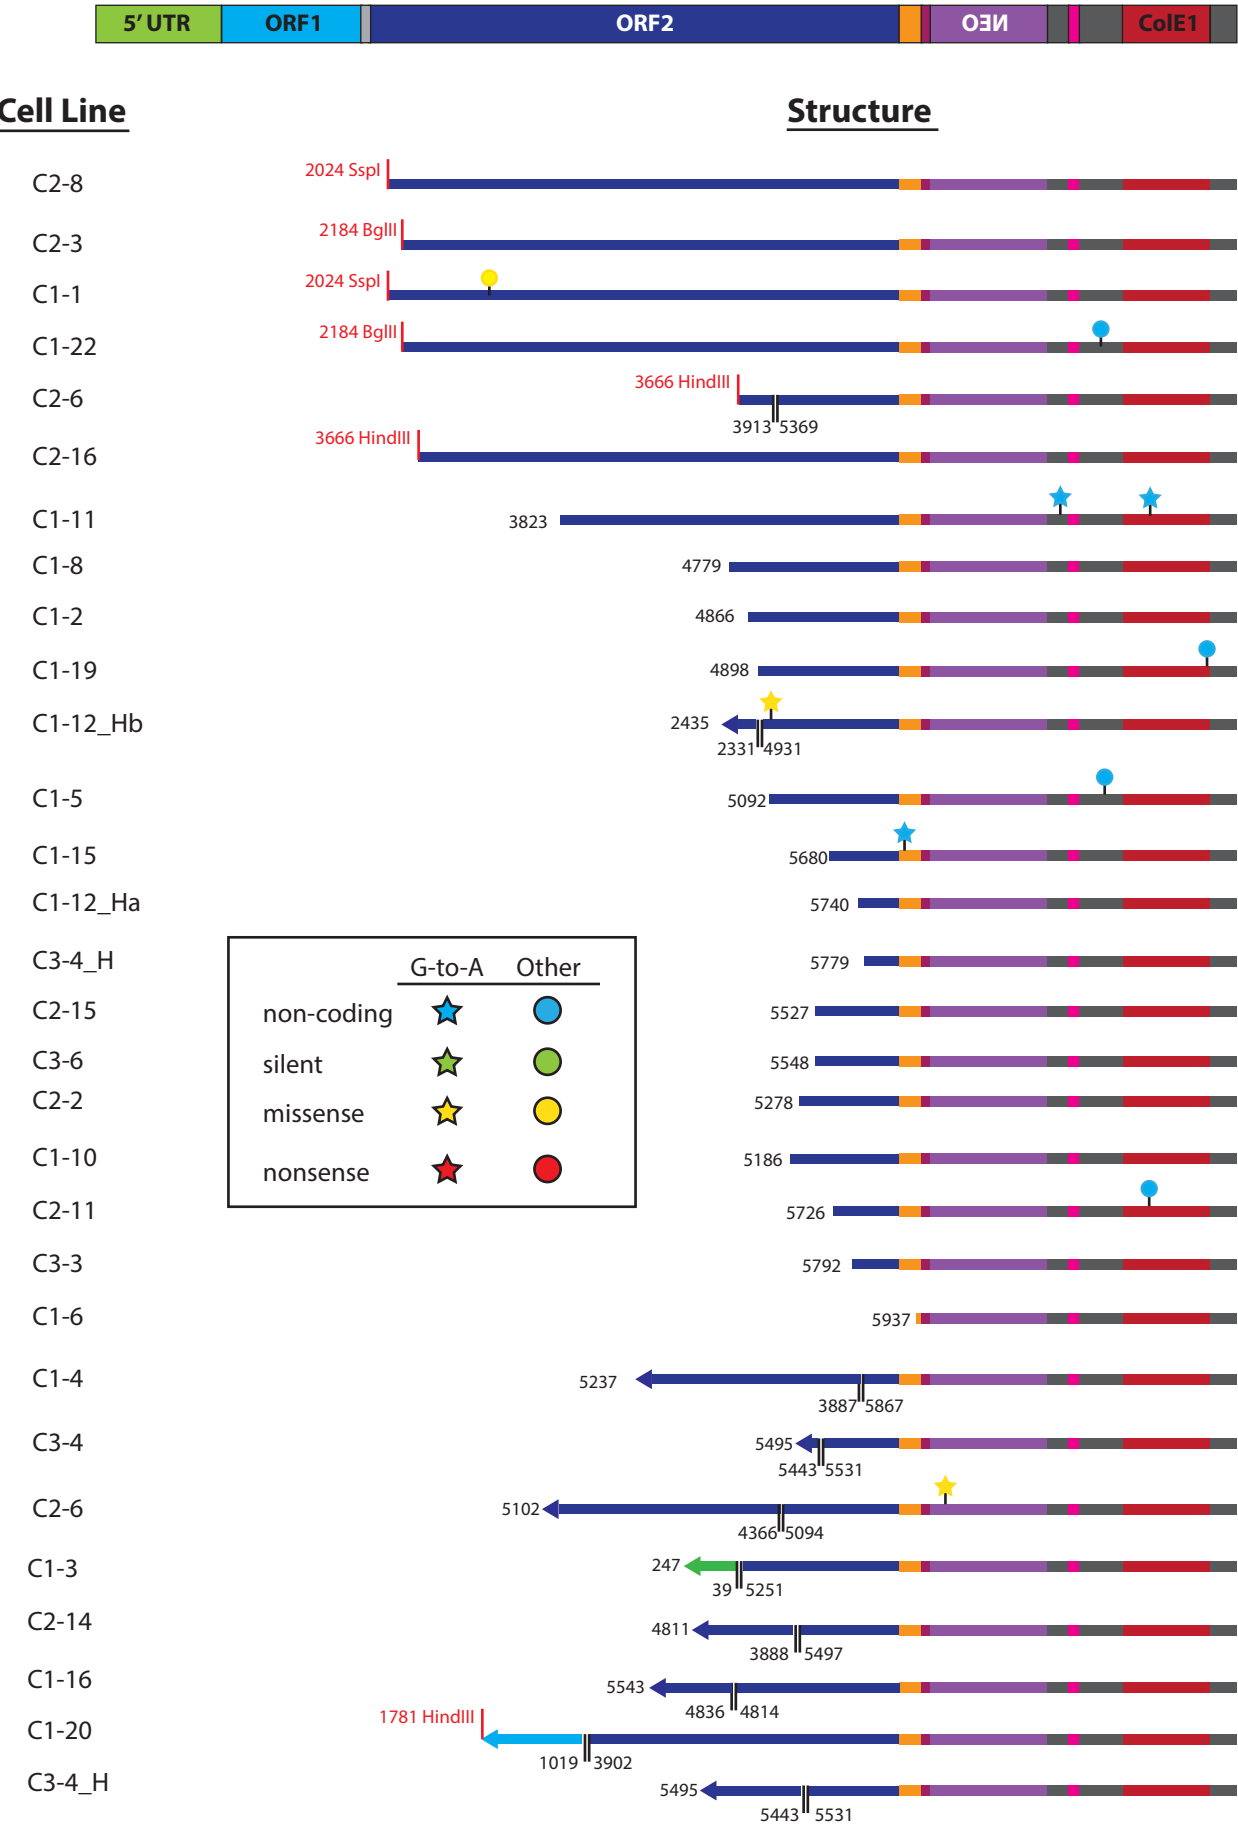

G-to-A

Other

non-coding

silent

missense

nonsense
