# Supplementary material for: APOBEC3A deaminates transiently exposed single-strand DNA during LINE-1 retrotransposition
Source: eLife journal article supplement (doi:10.7554/elife.02008), 2014-04-24
Supplement: supp [file elife-02008-supp-v1.zip › elife_poa_e02008_Figure_2_figure_supplement_2.pdf]

Figure 2-Figure Supplement 2

No rA3A

|           | # of sites in LEAP Product | available sites in 100 products | # of deamination events | percentage of available sites deaminated in 100 products |                      |
|-----------|----------------------------|---------------------------------|-------------------------|----------------------------------------------------------|----------------------|
| GGG       |                            |                                 |                         |                                                          |                      |
| AGG       |                            |                                 |                         |                                                          |                      |
| TGG       | 1                          | 100                             | 1                       | 1.0%                                                     |                      |
| CGG       |                            |                                 |                         |                                                          |                      |
| GGA       | 1                          | 100                             | 0                       | 0.0%                                                     |                      |
| AGA       | 2                          | 200                             | 0                       | 0.0%                                                     |                      |
| TGA       | 6                          | 600                             | 2                       | 0.3%                                                     |                      |
| CGA       |                            |                                 |                         |                                                          |                      |
| GGT       |                            |                                 |                         |                                                          |                      |
| AGT       | 3                          | 300                             | 0                       | 0.0%                                                     |                      |
| TGT       | 3                          | 300                             | 0                       | 0.0%                                                     |                      |
| CGT       |                            |                                 |                         |                                                          |                      |
| GGC       |                            |                                 |                         |                                                          |                      |
| AGC       | 1                          | 100                             | 0                       | 0.0%                                                     |                      |
| TGC       | 5                          | 500                             | 1                       | 0.2%                                                     |                      |
| CGC       |                            |                                 |                         |                                                          | adapters deaminated: |
| Total: 22 | 2200                       | 4                               | 0.2%                    | 1.0%                                                     |                      |

No rA3A + RNase H

|           | # of sites in LEAP Product | available sites in 100 products | # of deamination events | percentage of available sites deaminated in 100 products |                      |
|-----------|----------------------------|---------------------------------|-------------------------|----------------------------------------------------------|----------------------|
| GGG       |                            |                                 |                         |                                                          |                      |
| AGG       |                            |                                 |                         |                                                          |                      |
| TGG       | 1                          | 100                             | 0                       | 0.0%                                                     |                      |
| CGG       |                            |                                 |                         |                                                          |                      |
| GGA       | 1                          | 100                             | 4                       | 4.0%                                                     |                      |
| AGA       | 2                          | 200                             | 19                      | 9.5%                                                     |                      |
| TGA       | 6                          | 600                             | 25                      | 4.2%                                                     |                      |
| CGA       |                            |                                 |                         |                                                          |                      |
| GGT       |                            |                                 |                         |                                                          |                      |
| AGT       | 3                          | 300                             | 0                       | 0.0%                                                     |                      |
| TGT       | 3                          | 300                             | 0                       | 0.0%                                                     |                      |
| CGT       |                            |                                 |                         |                                                          |                      |
| GGC       |                            |                                 |                         |                                                          |                      |
| AGC       | 1                          | 100                             | 0                       | 0.0%                                                     |                      |
| TGC       | 5                          | 500                             | 0                       | 0.0%                                                     |                      |
| CGC       |                            |                                 |                         |                                                          | adapters deaminated: |
| Total: 22 | 2200                       | 48                              | 2.2%                    | 2.0%                                                     |                      |

rA3A

|           | # of sites in LEAP Product | available sites in 100 products | # of deamination events | percentage of available sites deaminated in 100 products |                      |
|-----------|----------------------------|---------------------------------|-------------------------|----------------------------------------------------------|----------------------|
| GGG       |                            |                                 |                         |                                                          |                      |
| AGG       |                            |                                 |                         |                                                          |                      |
| TGG       | 1                          | 100                             | 3                       | 3.0%                                                     |                      |
| CGG       |                            |                                 |                         |                                                          |                      |
| GGA       | 1                          | 100                             | 3                       | 3.0%                                                     |                      |
| AGA       | 2                          | 200                             | 13                      | 6.5%                                                     |                      |
| TGA       | 6                          | 600                             | 25                      | 4.2%                                                     |                      |
| CGA       |                            |                                 |                         |                                                          |                      |
| GGT       |                            |                                 |                         |                                                          |                      |
| AGT       | 3                          | 300                             | 0                       | 0.0%                                                     |                      |
| TGT       | 3                          | 300                             | 0                       | 0.0%                                                     |                      |
| CGT       |                            |                                 |                         |                                                          |                      |
| GGC       |                            |                                 |                         |                                                          |                      |
| AGC       | 1                          | 100                             | 0                       | 0.0%                                                     |                      |
| TGC       | 5                          | 500                             | 0                       | 0.0%                                                     |                      |
| CGC       |                            |                                 |                         |                                                          | adapters deaminated: |
| Total: 22 | 2200                       | 44                              | 2.0%                    | 91.0%                                                    |                      |

rA3A + RNase H

|           | # of sites in LEAP Product | available sites in 100 products | # of deamination events | percentage of available sites deaminated in 100 products |                      |
|-----------|----------------------------|---------------------------------|-------------------------|----------------------------------------------------------|----------------------|
| GGG       |                            |                                 |                         |                                                          |                      |
| AGG       |                            |                                 |                         |                                                          |                      |
| TGG       | 1                          | 100                             | 5                       | 5.0%                                                     |                      |
| CGG       |                            |                                 |                         |                                                          |                      |
| GGA       | 1                          | 100                             | 5                       | 5.0%                                                     |                      |
| AGA       | 2                          | 200                             | 75                      | 37.5%                                                    |                      |
| TGA       | 6                          | 600                             | 228                     | 38.0%                                                    |                      |
| CGA       |                            |                                 |                         |                                                          |                      |
| GGT       |                            |                                 |                         |                                                          |                      |
| AGT       | 3                          | 300                             | 4                       | 1.3%                                                     |                      |
| TGT       | 3                          | 300                             | 8                       | 2.7%                                                     |                      |
| CGT       |                            |                                 |                         |                                                          |                      |
| GGC       |                            |                                 |                         |                                                          |                      |
| AGC       | 1                          | 100                             | 0                       | 0.0%                                                     |                      |
| TGC       | 5                          | 500                             | 5                       | 1.0%                                                     |                      |
| CGC       |                            |                                 |                         |                                                          | adapters deaminated: |
| Total: 22 | 2200                       | 330                             | 15.0%                   | 50.0%                                                    |                      |

rA3A\_C106S

|           | # of sites in LEAP Product | available sites in 100 products | # of deamination events | percentage of available sites deaminated in 100 products |                      |
|-----------|----------------------------|---------------------------------|-------------------------|----------------------------------------------------------|----------------------|
| GGG       |                            |                                 |                         |                                                          |                      |
| AGG       |                            |                                 |                         |                                                          |                      |
| TGG       | 1                          | 100                             | 0                       | 0.0%                                                     |                      |
| CGG       |                            |                                 |                         |                                                          |                      |
| GGA       | 1                          | 100                             | 0                       | 0.0%                                                     |                      |
| AGA       | 2                          | 200                             | 2                       | 1.0%                                                     |                      |
| TGA       | 6                          | 600                             | 2                       | 0.3%                                                     |                      |
| CGA       |                            |                                 |                         |                                                          |                      |
| GGT       |                            |                                 |                         |                                                          |                      |
| AGT       | 3                          | 300                             | 0                       | 0.0%                                                     |                      |
| TGT       | 3                          | 300                             | 1                       | 0.3%                                                     |                      |
| CGT       |                            |                                 |                         |                                                          |                      |
| GGC       |                            |                                 |                         |                                                          |                      |
| AGC       | 1                          | 100                             | 0                       | 0.0%                                                     |                      |
| TGC       | 5                          | 500                             | 0                       | 0.0%                                                     |                      |
| CGC       |                            |                                 |                         |                                                          | adapters deaminated: |
| Total: 22 | 2200                       | 5                               | 0.2%                    | 1.0%                                                     |                      |

rA3A\_C106S + RNase H

|           | # of sites in LEAP Product | available sites in 100 products | # of deamination events | percentage of available sites deaminated in 100 products |                      |
|-----------|----------------------------|---------------------------------|-------------------------|----------------------------------------------------------|----------------------|
| GGG       |                            |                                 |                         |                                                          |                      |
| AGG       |                            |                                 |                         |                                                          |                      |
| TGG       | 1                          | 100                             | 1                       | 1.0%                                                     |                      |
| CGG       |                            |                                 |                         |                                                          |                      |
| GGA       | 1                          | 100                             | 2                       | 2.0%                                                     |                      |
| AGA       | 2                          | 200                             | 15                      | 7.5%                                                     |                      |
| TGA       | 6                          | 600                             | 40                      | 6.7%                                                     |                      |
| CGA       |                            |                                 |                         |                                                          |                      |
| GGT       |                            |                                 |                         |                                                          |                      |
| AGT       | 3                          | 300                             | 0                       | 0.0%                                                     |                      |
| TGT       | 3                          | 300                             | 0                       | 0.0%                                                     |                      |
| CGT       |                            |                                 |                         |                                                          |                      |
| GGC       |                            |                                 |                         |                                                          |                      |
| AGC       | 1                          | 100                             | 0                       | 0.0%                                                     |                      |
| TGC       | 5                          | 500                             | 0                       | 0.0%                                                     |                      |
| CGC       |                            |                                 |                         |                                                          | adapters deaminated: |
| Total: 22 | 2200                       | 58                              | 2.6%                    | 1.0%                                                     |                      |
