# Supplementary figures and images for: APOBEC3A deaminates transiently exposed single-strand DNA during LINE-1 retrotransposition
Source: eLife journal article supplement (doi:10.7554/elife.02008), 2014-04-24

Figure 3-Figure Supplement 2

Beta-arr insertions; JM140/L1.3/ $\Delta^2$ /k7:

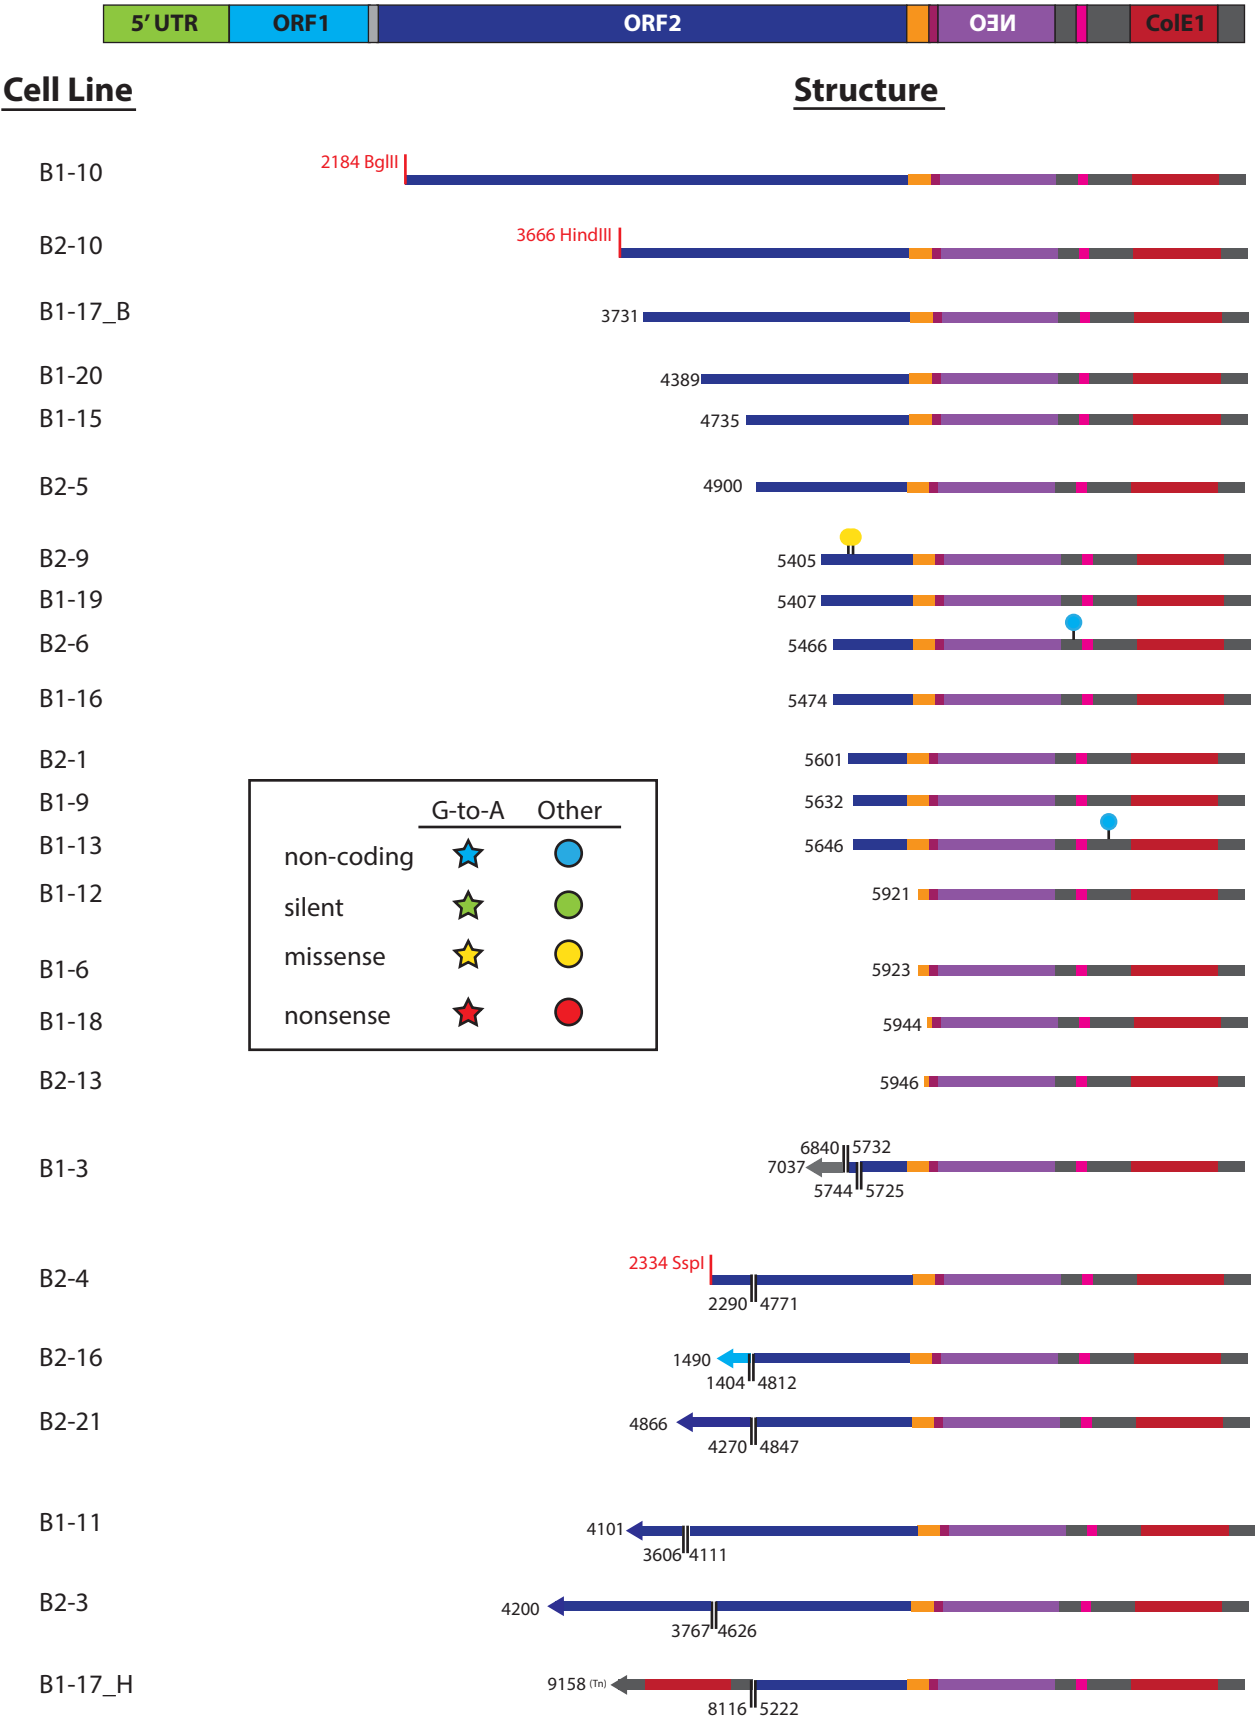

Supplement: supp [file elife-02008-supp-v1.zip]

Figure 3-Figure Supplement 1

A.

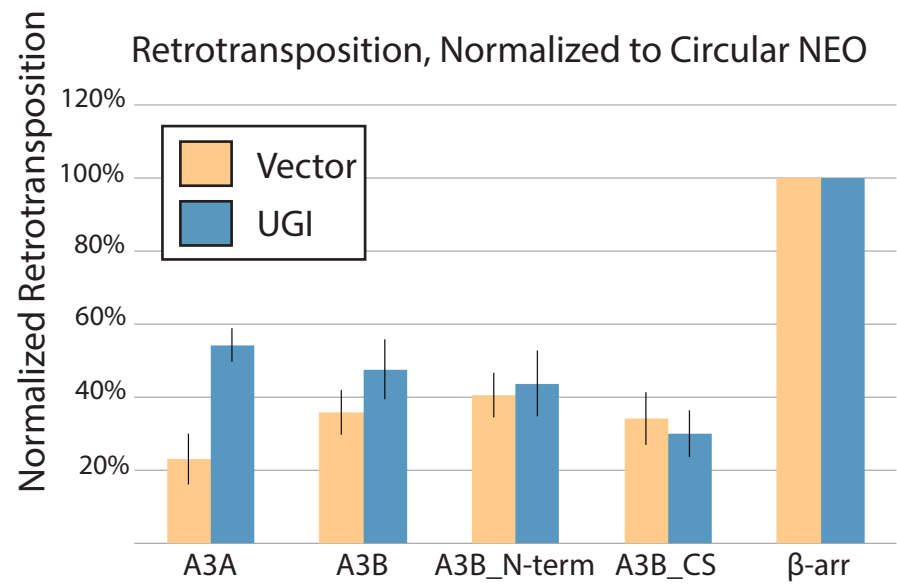

B.

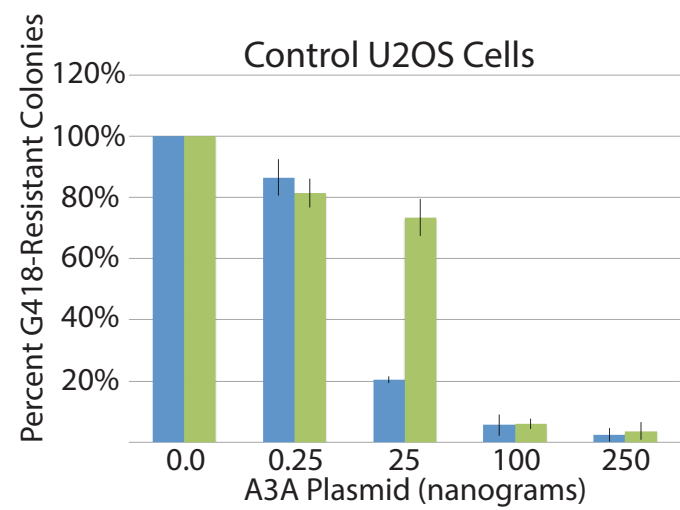

C.

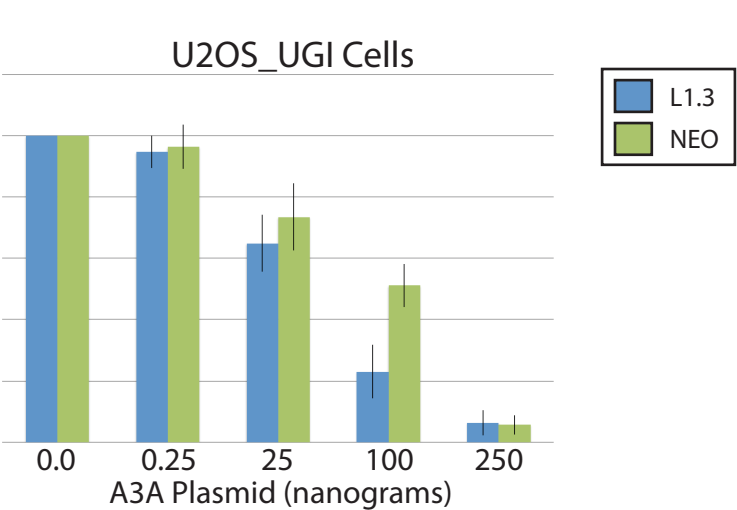

Supplement: supp [file elife-02008-supp-v1.zip]

Figure 1-Figure Supplement 1

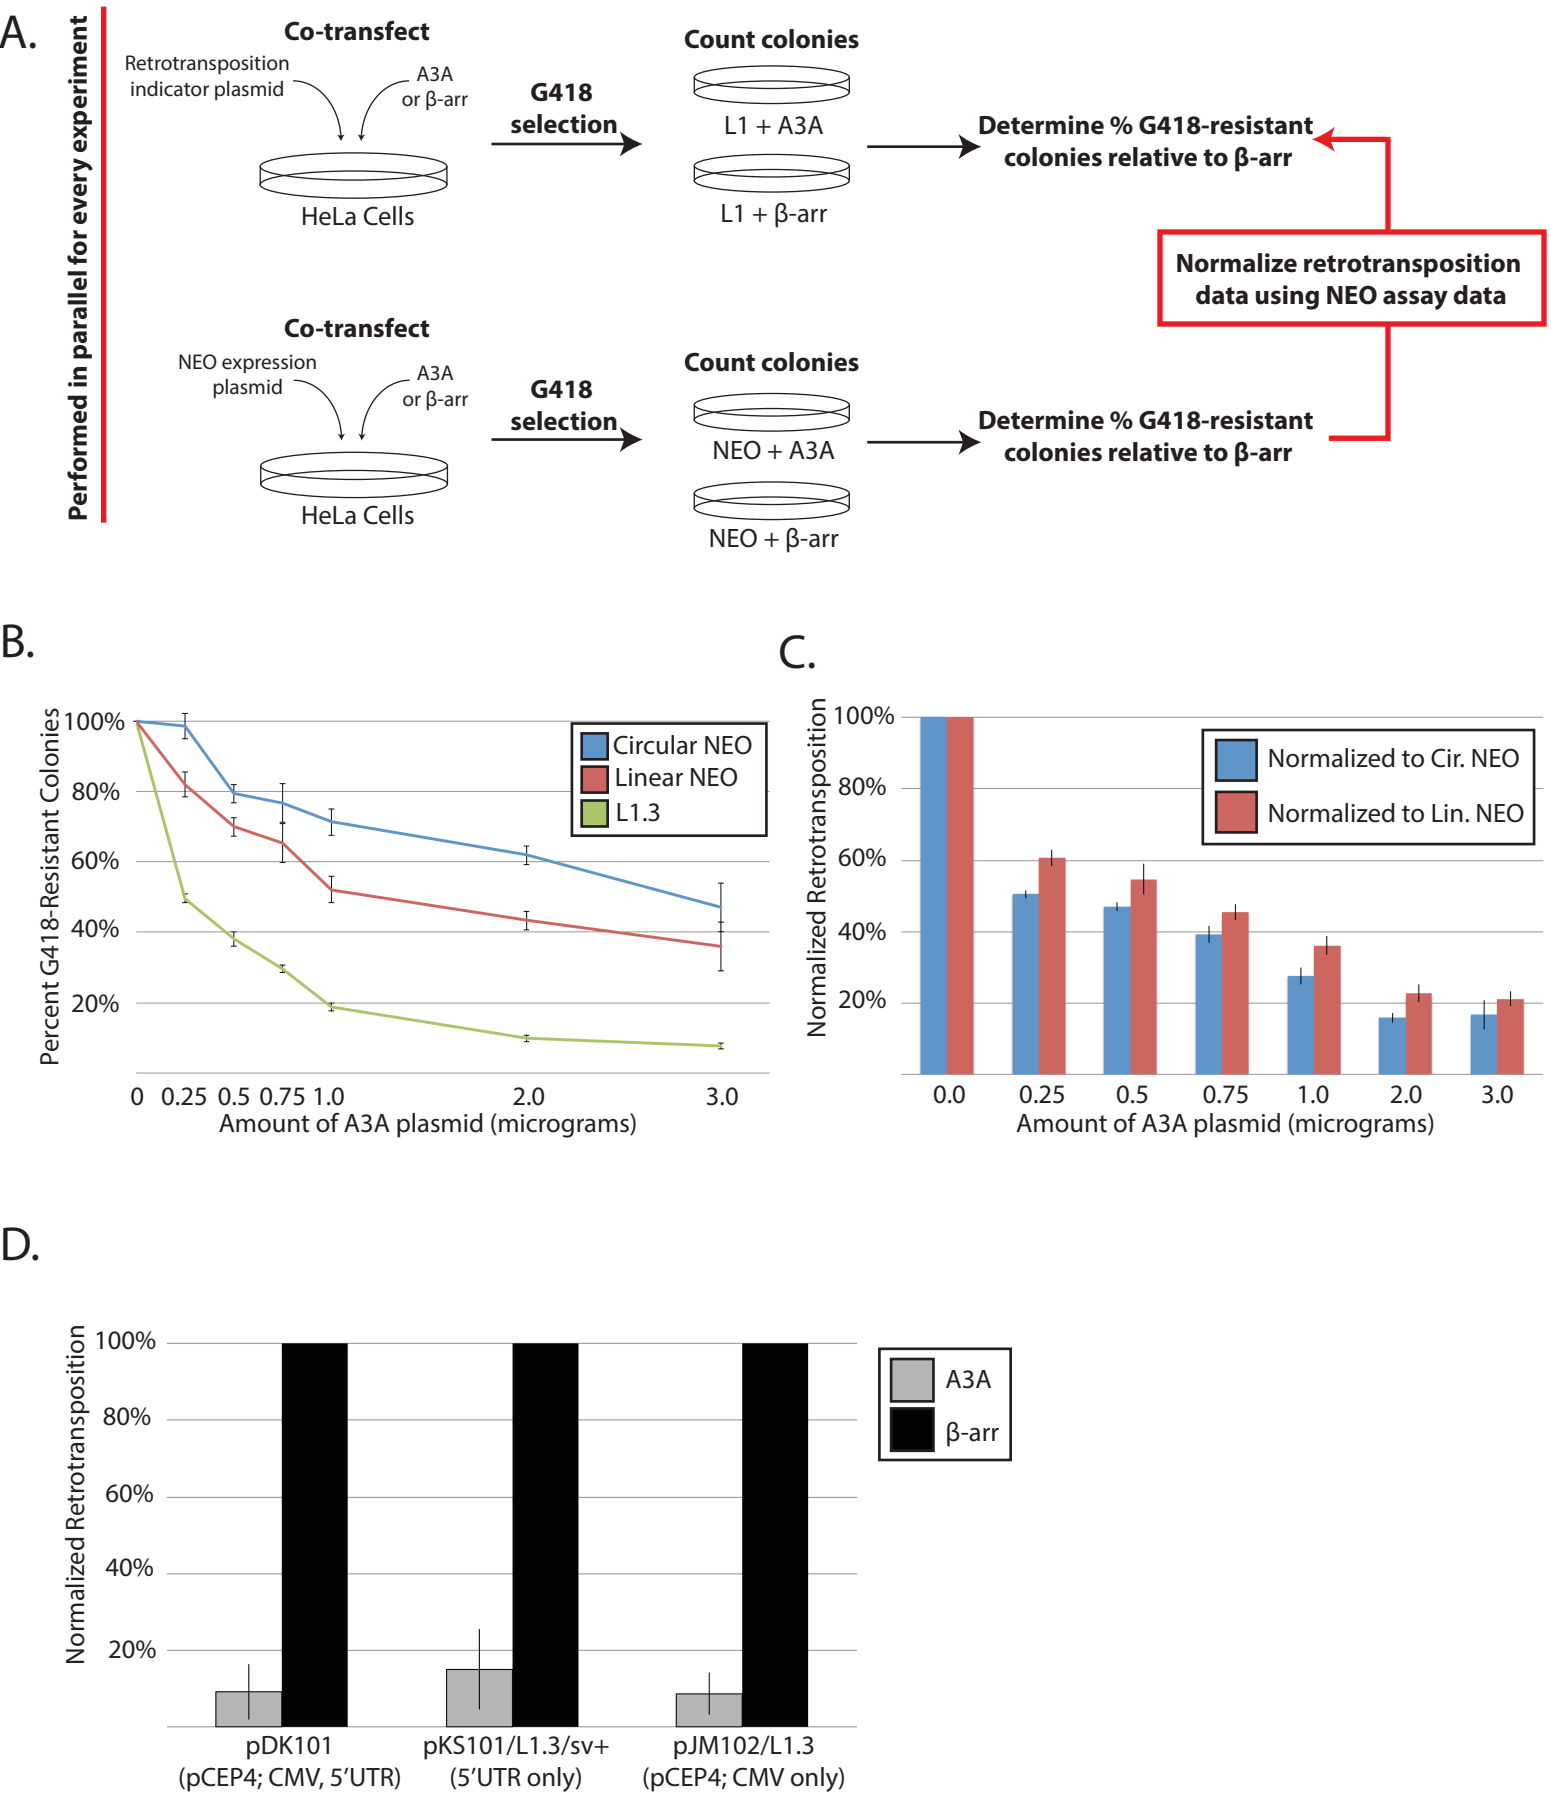

Supplement: supp [file elife-02008-supp-v1.zip › elife_poa_e02008_Figure_1_figure_supplement_1.pdf]

Figure 3-Figure Supplement 3

A3A-C106S insertions; JM140/L1.3/ $\Delta^2$ /k7:

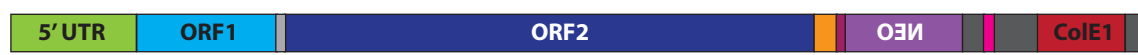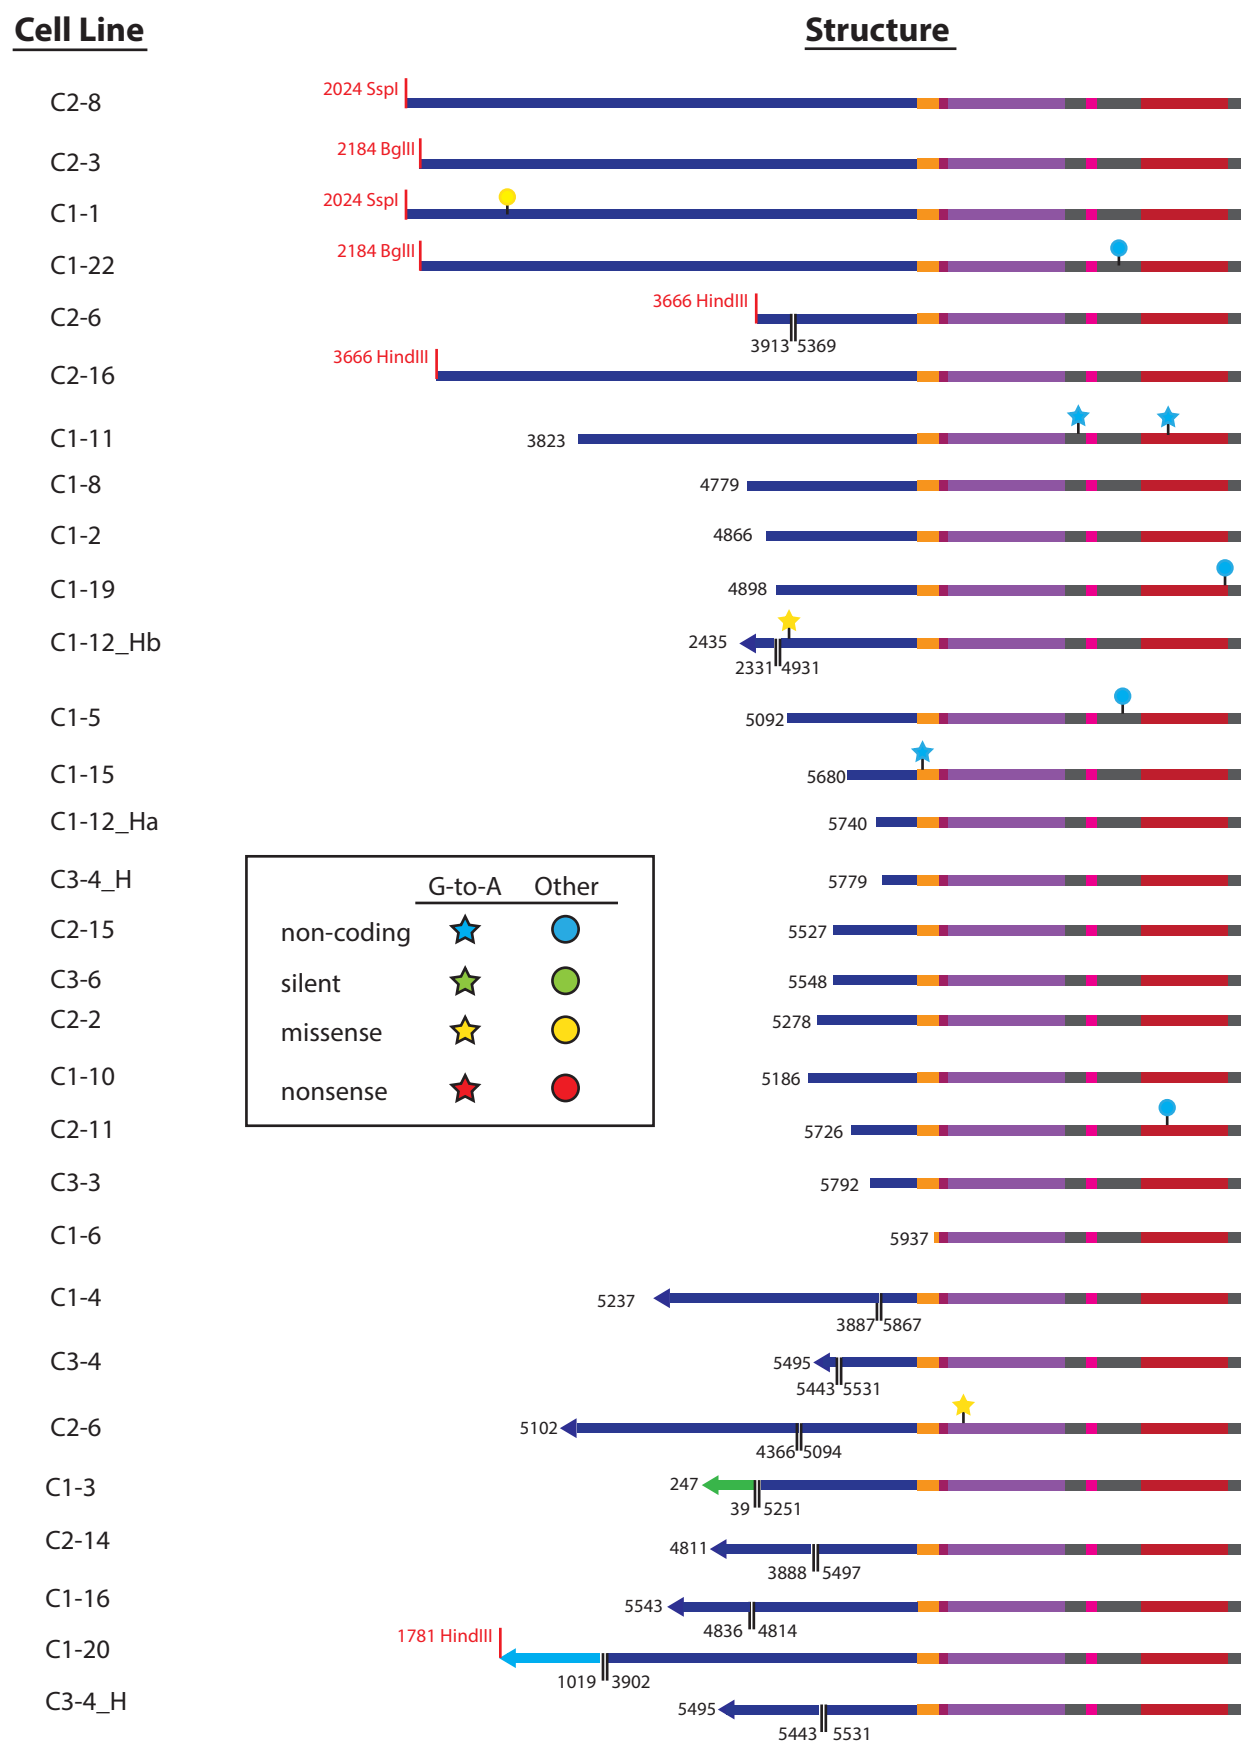

Supplement: supp [file elife-02008-supp-v1.zip › elife_poa_e02008_Figure_3_figure_supplement_3.pdf]

Figure 2-Figure Supplement 3

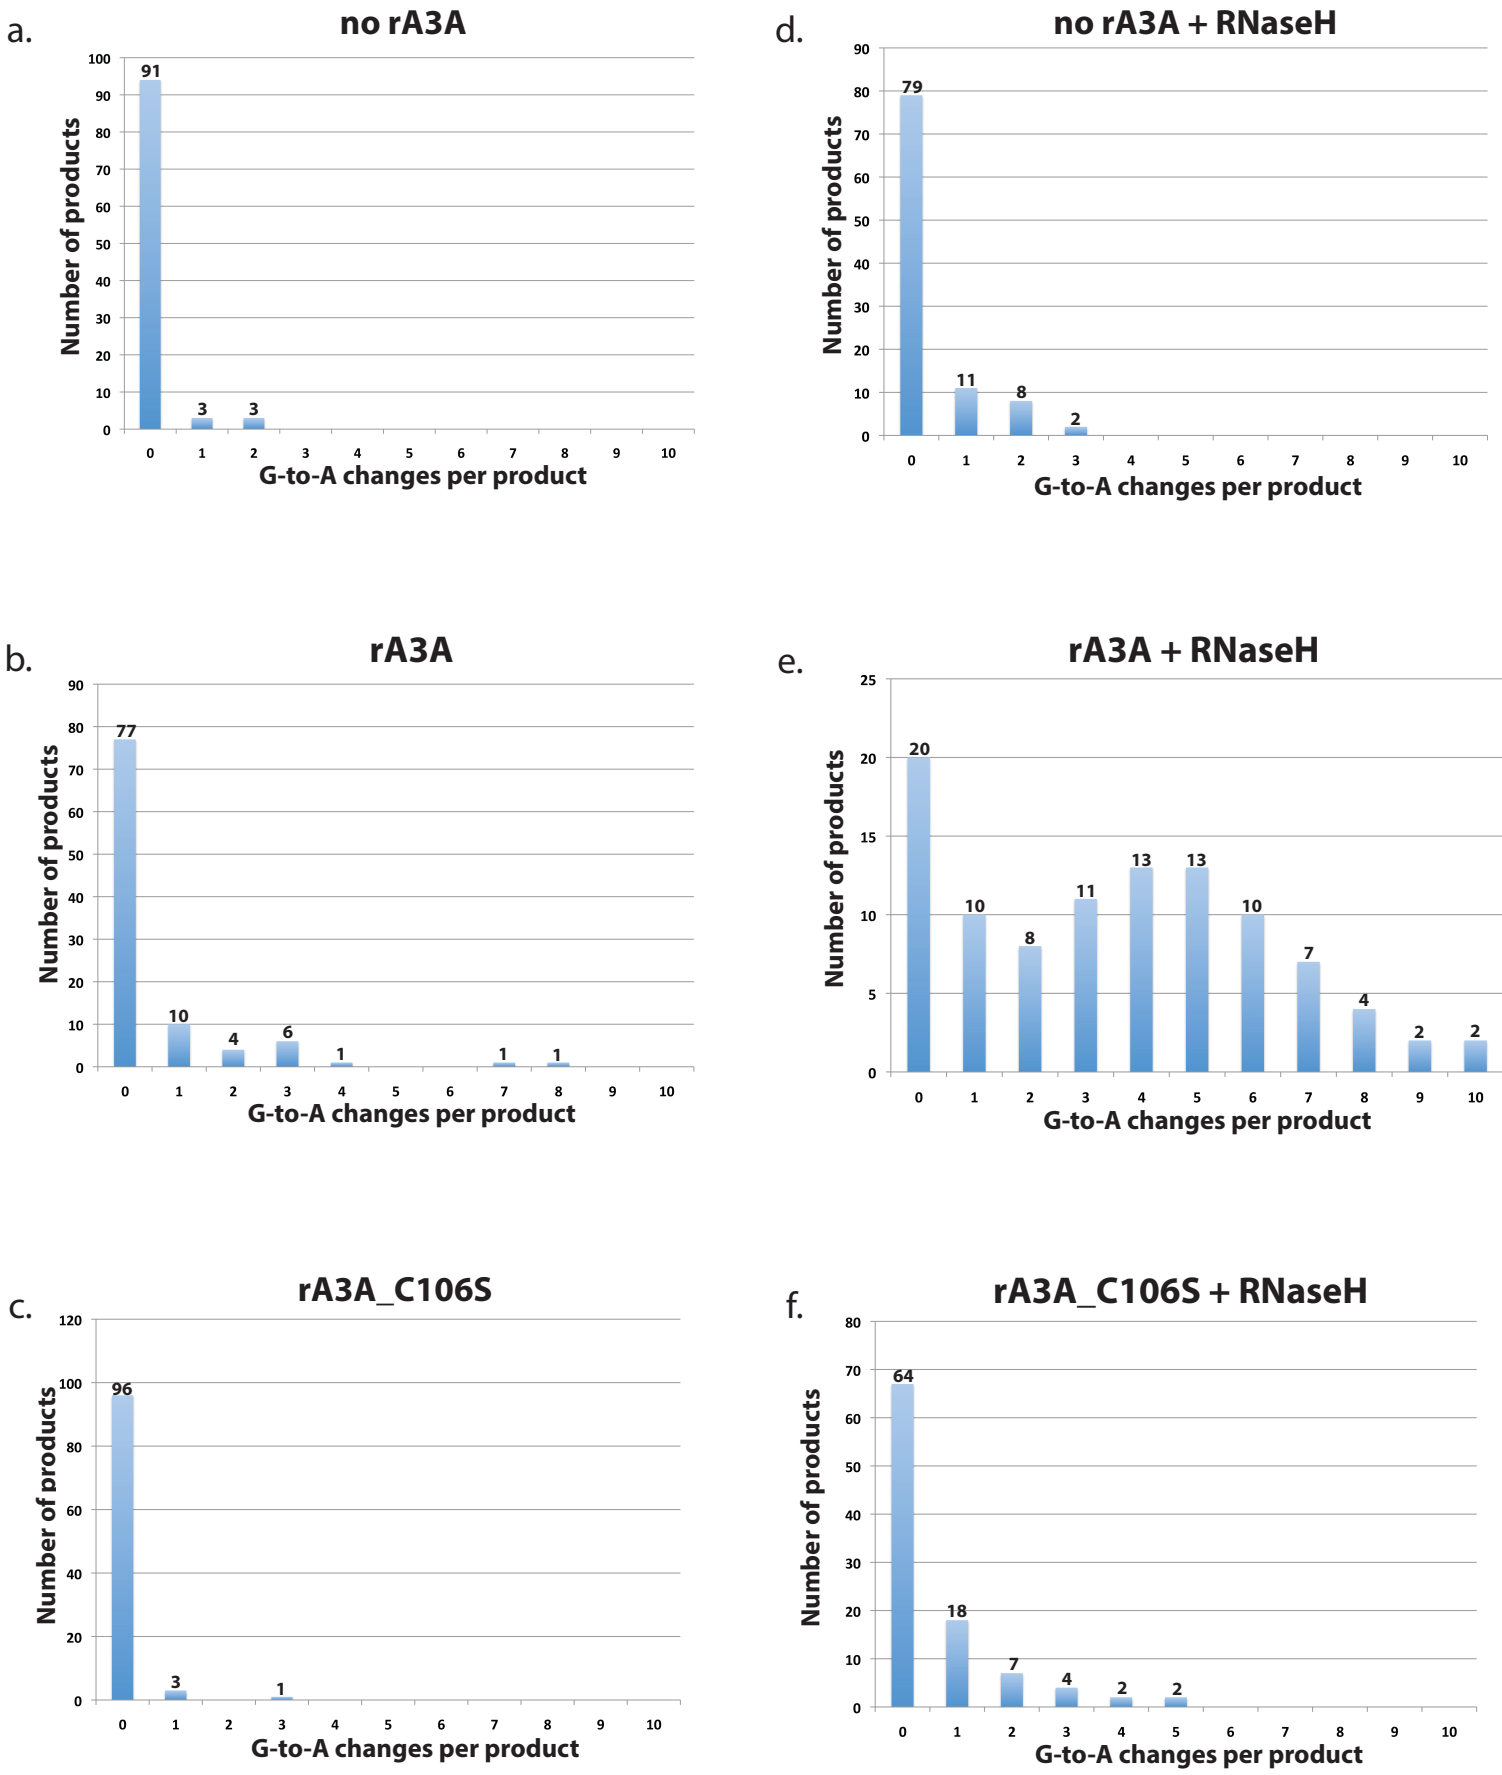

Supplement: supp [file elife-02008-supp-v1.zip › elife_poa_e02008_Figure_2_figure_supplement_3.pdf]

Figure 2-Figure Supplement 1

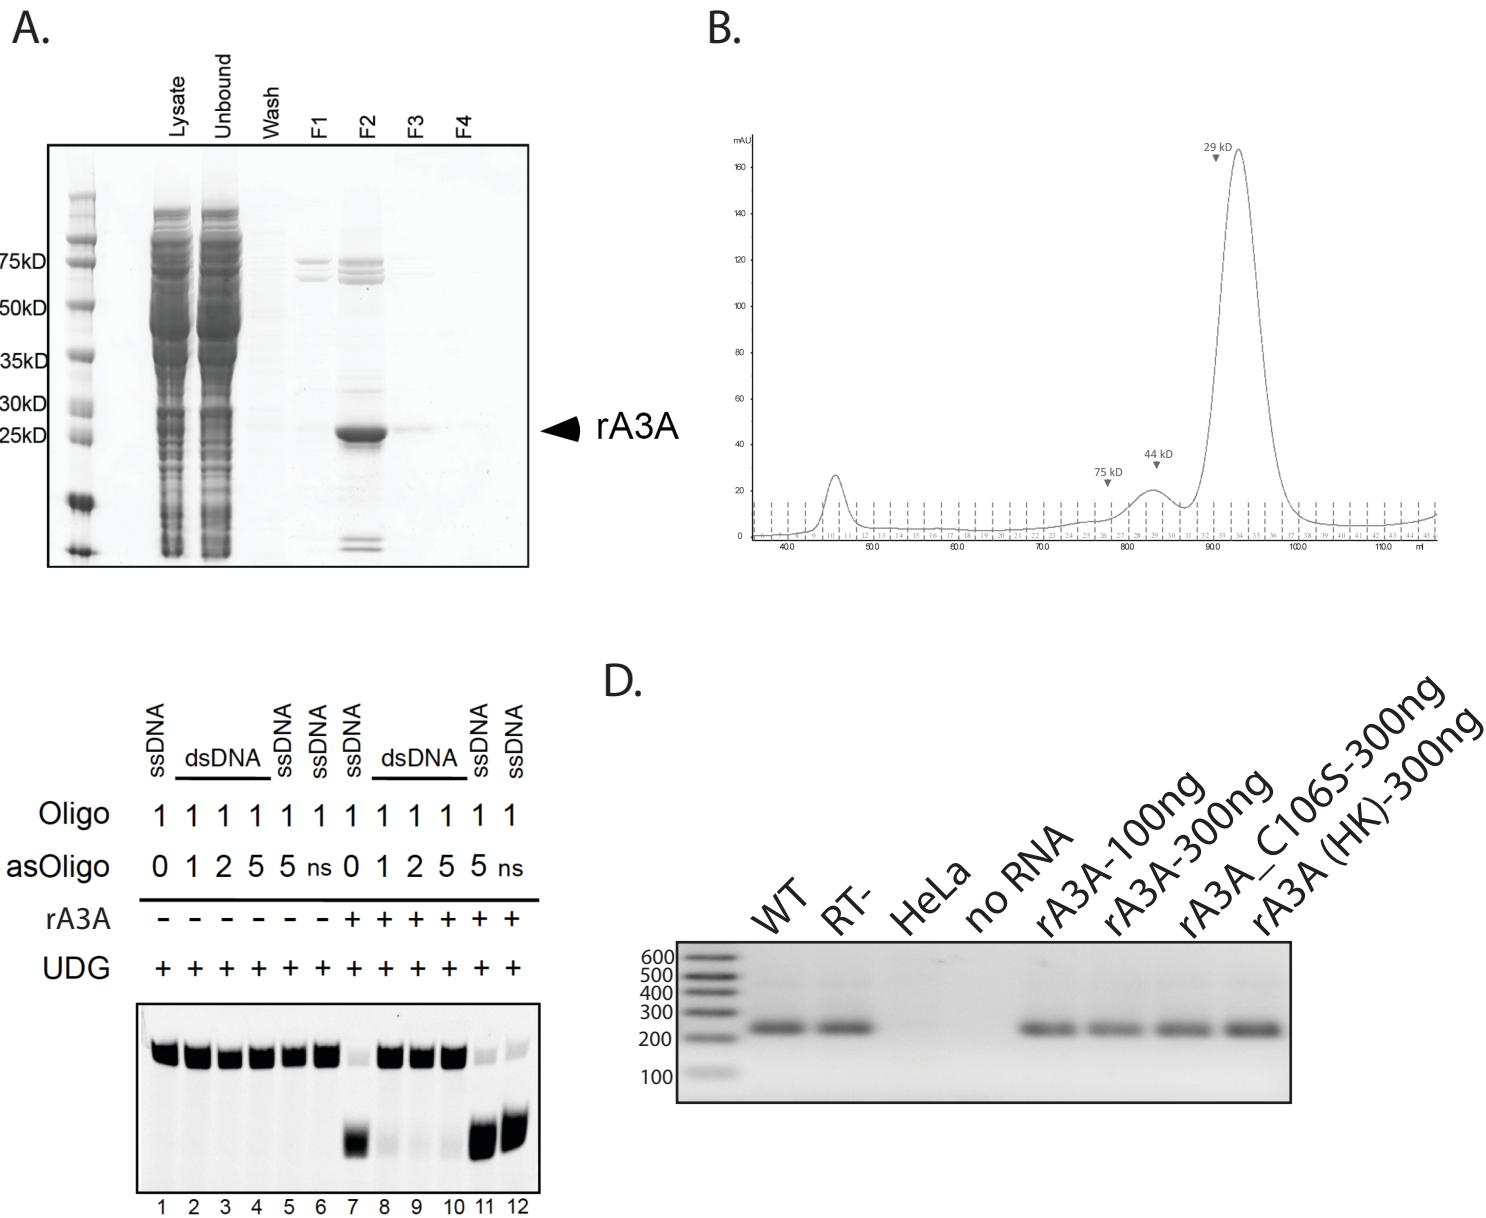

Supplement: supp [file elife-02008-supp-v1.zip › elife_poa_e02008_Figure_2_figure_supplement_1.pdf]

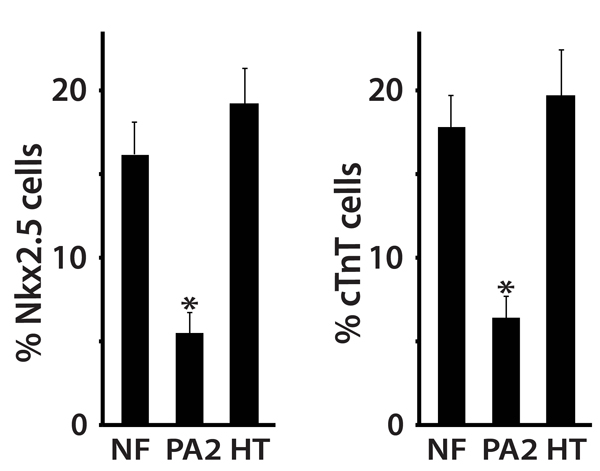

Supplement: supp [file elife-02008-supp-v1.zip › elife_poa_e02008_Figure_3_figure_supplement_5.pdf]
